# Supplementary material for: Structural absorption by barbule microstructures of super black bird of paradise feathers
Source: PubMed Central journal article supplement (PMC5760687; doi:10.1038/s41467-017-02088-w), 2018-01-09
Supplement: 41467_2017_2088_MOESM1_ESM.pdf [file 41467_2017_2088_MOESM1_ESM.pdf]

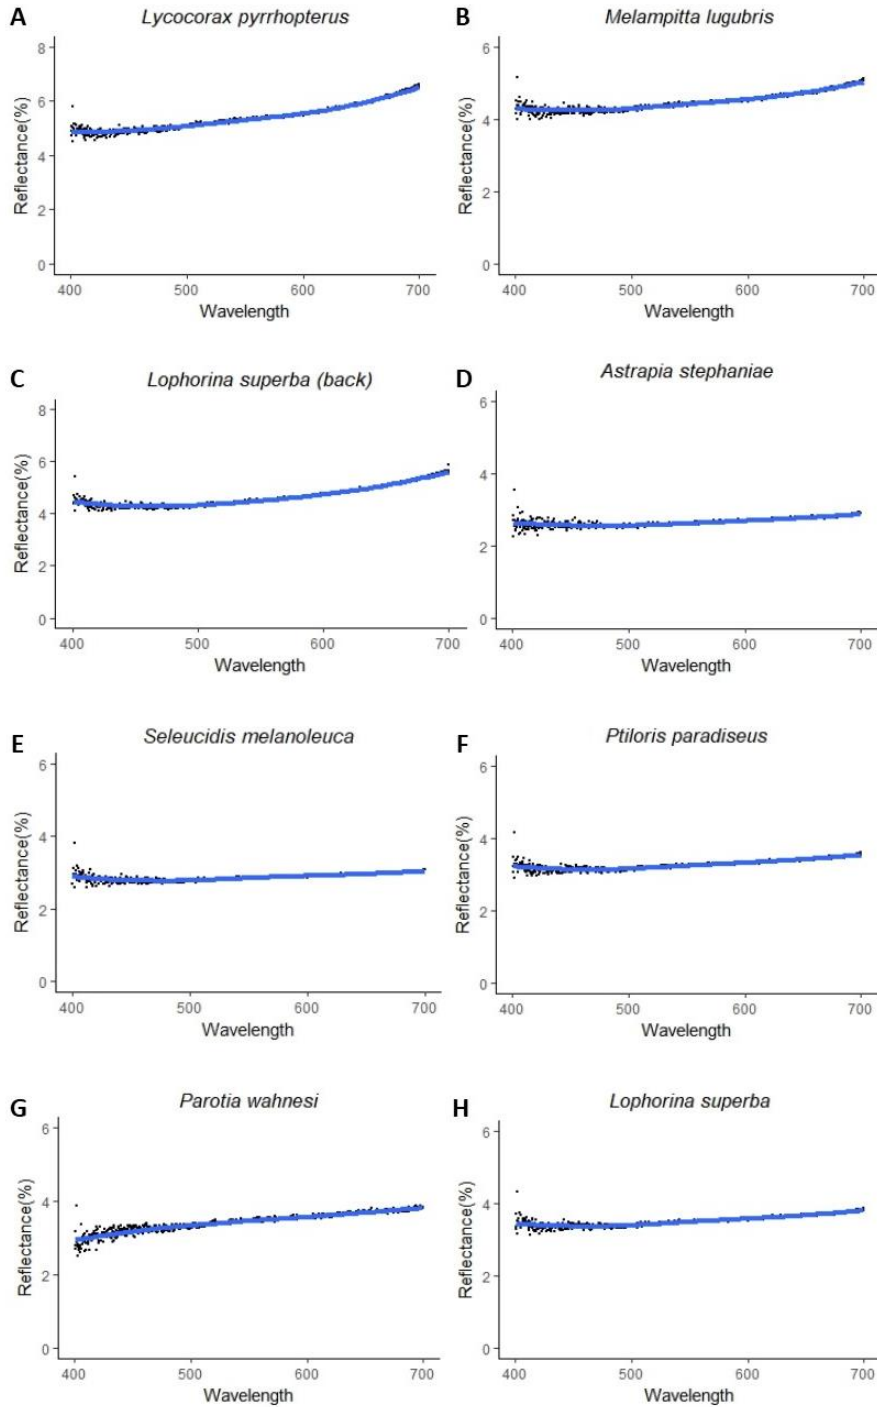

**Supplementary Figure 1. Total reflectance spectra from integrating sphere of plumage patches.** Spectra are averages of two specimens except for *Astrapia* and *Parotia*. Real data is plotted in black points, and Loess smoothing curve is shown in blue. (A) *Lycocorax pyrrhopterus* back. (B) *Melampitta lugubris* breast. (C) *Astrapia stephaniae* breast. (D) *Seleucidis melanoleuca* breast. (E) *Ptiloris paradiseus* breast. (F) *Parotia wahnesi* crown. (G) *Lophorina superba* cape.

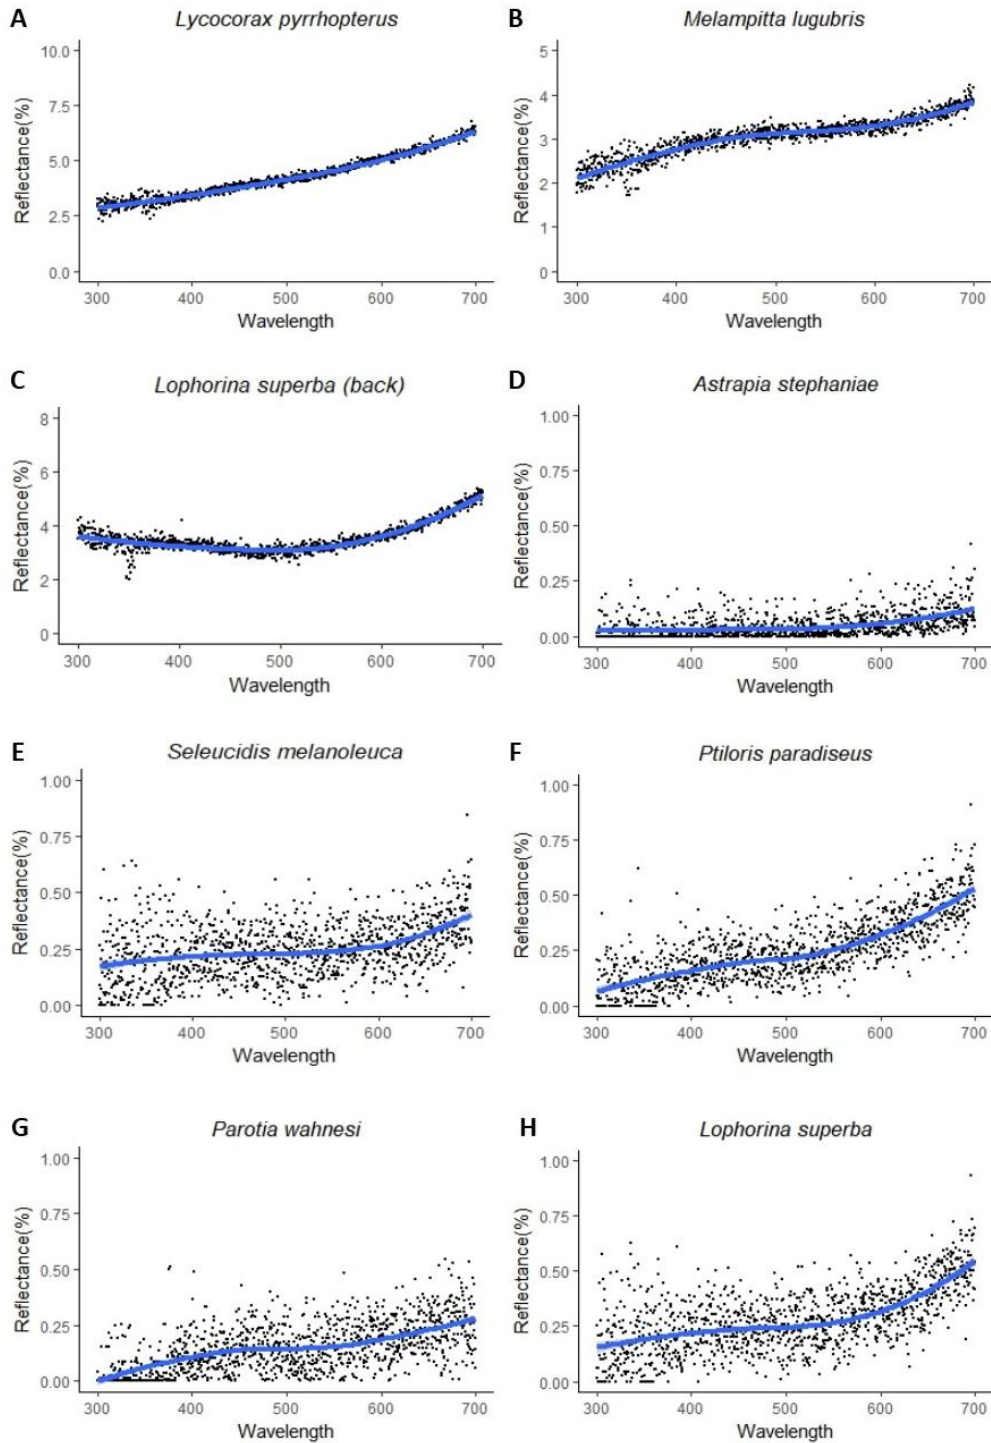

**Supplementary Figure 2. Normal ( $0^\circ$ ) directional reflectance.** Each spectrum is the average of five measurements from one individual specimen. Real data is plotted in black points, and Loess smoothing curve is shown in blue. (A) *Lycocorax pyrrhopterus* back. (B) *Melampitta lugubris* breast. (C) *Lophorina superba* back. (D) *Astrapia stephaniae* breast. (E) *Seleucidis melanoleuca* breast. (F) *Ptiloris paradiseus* breast. (G) *Parotia wahnesi* crown. (H) *Lophorina superba* cape.

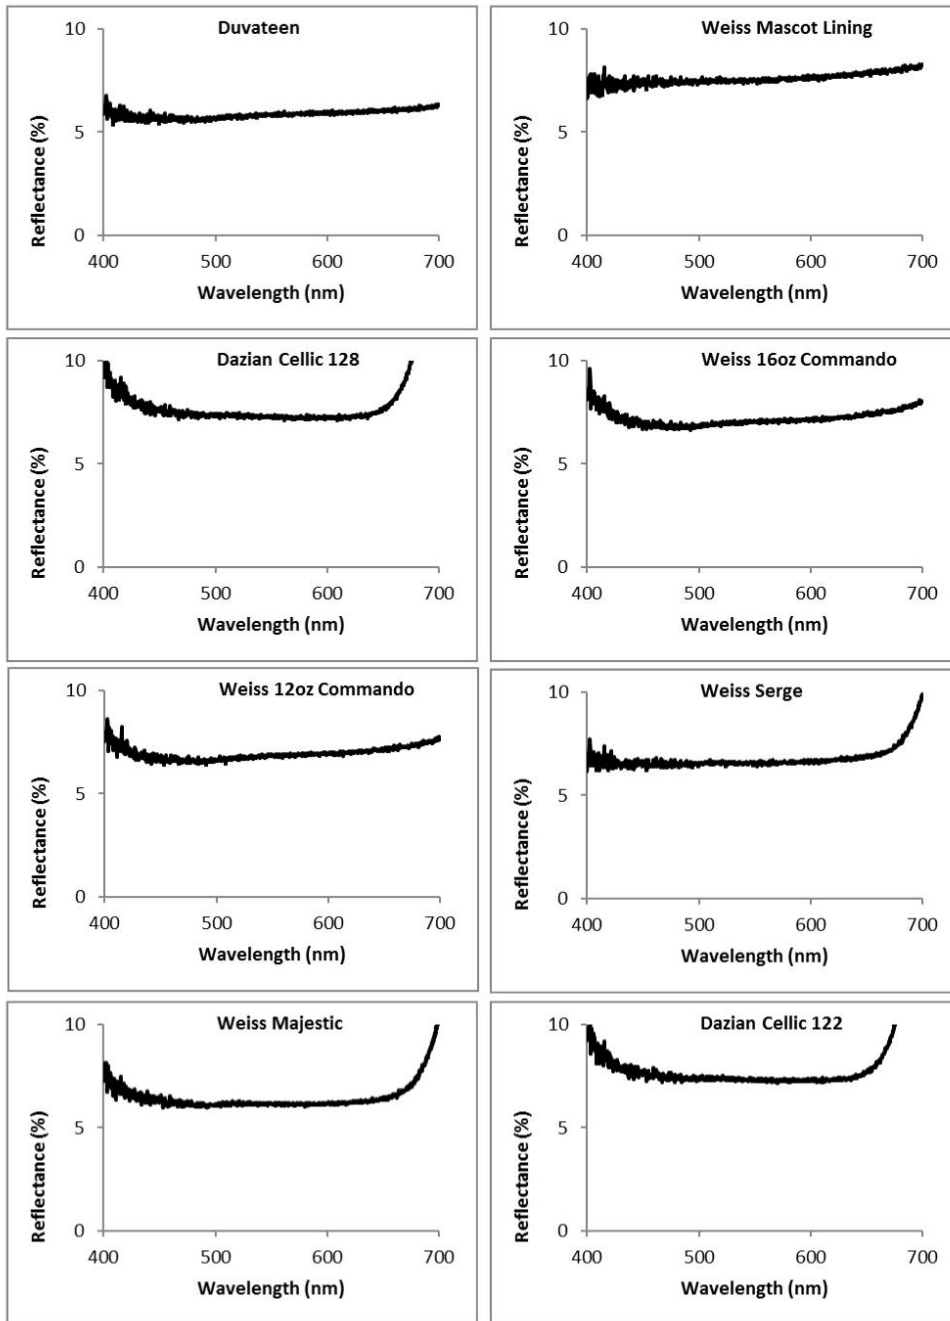

**Supplementary Figure 3. Total integrated diffuse and specular reflectance, using an integrating sphere, of commercially produced velvet.** The panels represent different brands and makes of velvet fabric, as labeled.

(A) *Lycocorax pyrrhopterus* back

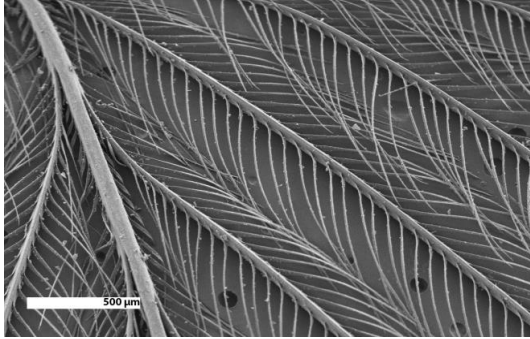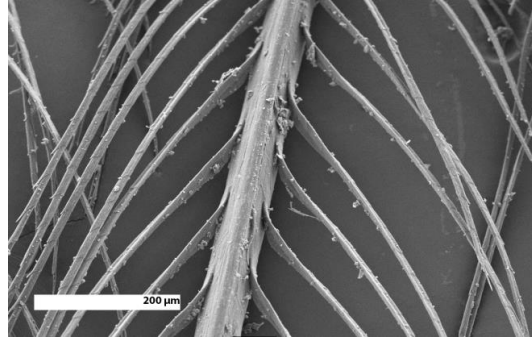

(B) *Melampitta lugubris* breast

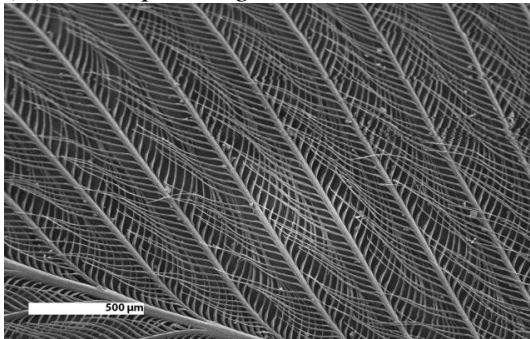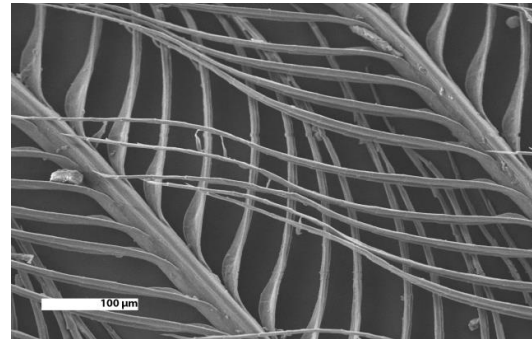

(C) *Astrapia stephaniae* breast

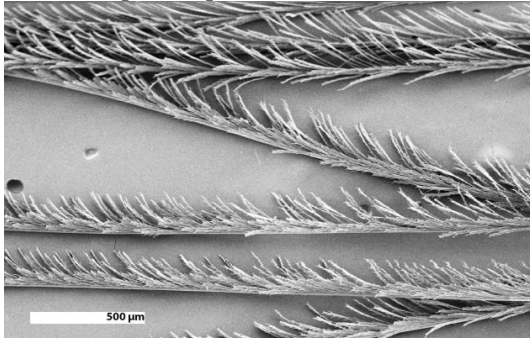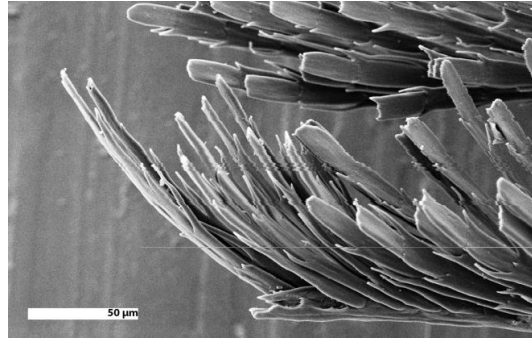

(D) *Seleucidis melanoleuca* breast

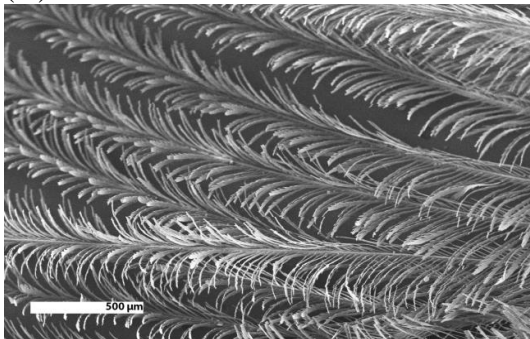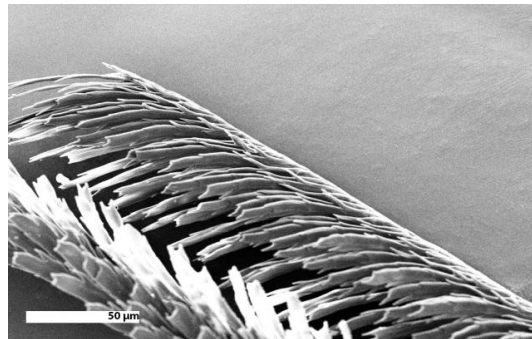

(E) *Ptiloris paradiseus* breast

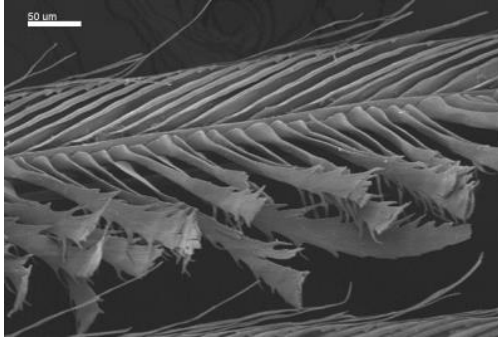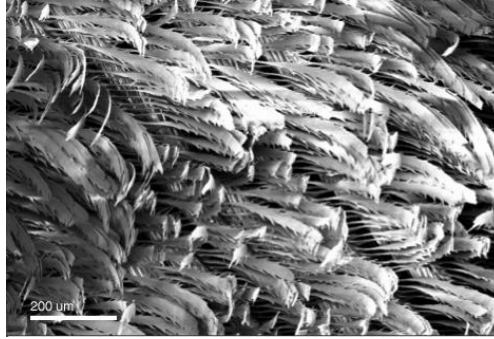

(F) *Parotia wahnesi* crown

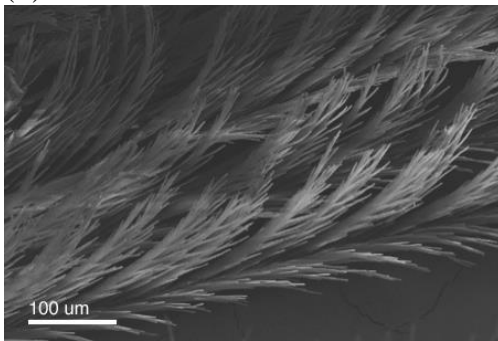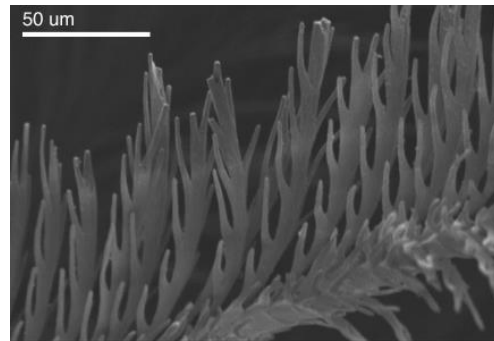

(G) *Lophorina superba* cape

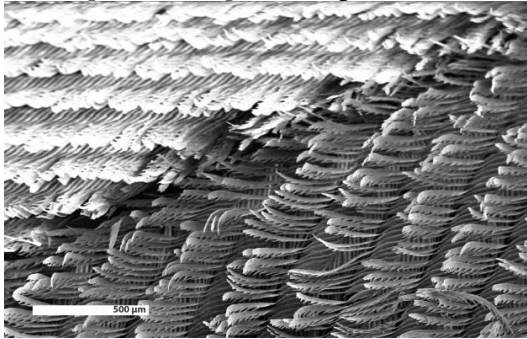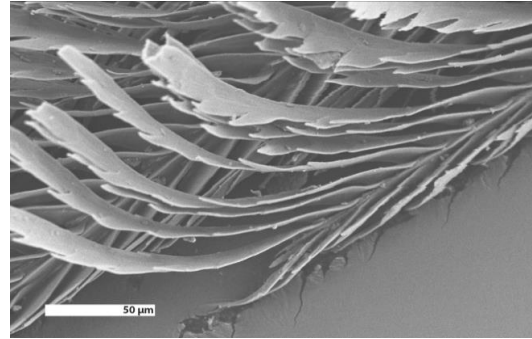

**Supplementary Figure 4. SEM micrographs of the exposed tips of black feathers with normal barbules (A–B), and super black feathers with arrays of modified barbules (C–G).** (A) *Lycorax pyrrhopterus* back feather. (B) *Melampitta lugubris* breast feather. (C) *Astrapia stephaniae* breast feather. (D) *Seleucidis melanoleuca* breast feather. (E) *Ptiloris paradiseus* breast feather. (F) *Parotia wahnesi* crown feather. (G) *Lophorina superba* cape feather.

A. *Lycocorax pyrrhopterus*

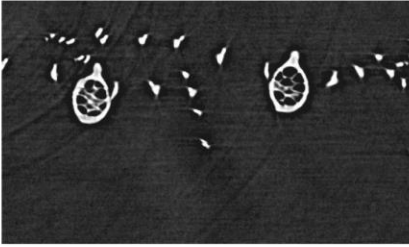

B. *Melampitta lugubris*

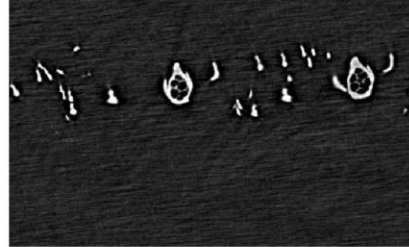

C. *Astrapia stephaniae*

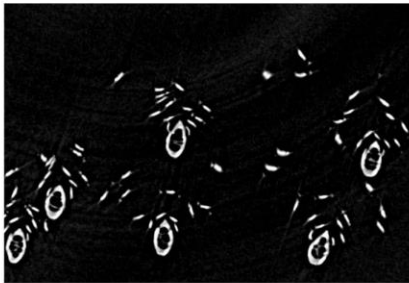

D. *Seleucidis melanoleuca*

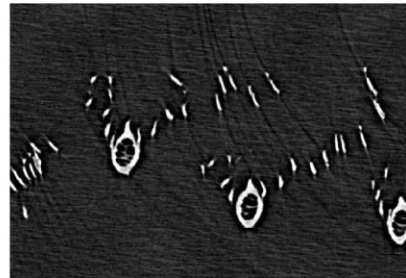

E. *Ptiloris paradiseus*

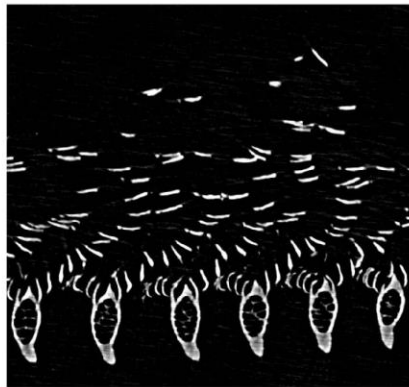

F. *Parotia wahnesi*

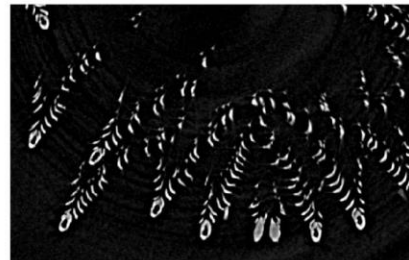

100µm

**Supplementary Figure 5. Slices of high-resolution synchrotron X-ray data sets of the exposed tips of black feathers with normal barbules (A–B), and super black feathers with arrays of modified barbules (C–F). (A) *Lycocorax pyrrhopterus* back feather. (B) *Melampitta lugubris* breast feather. (C) *Astrapia stephaniae* breast feather. (D) *Seleucidis melanoleuca* breast feather. (E) *Ptiloris paradiseus* breast feather. (F) *Parotia wahnesi* crown feather. Scale bar is 100 µm.**

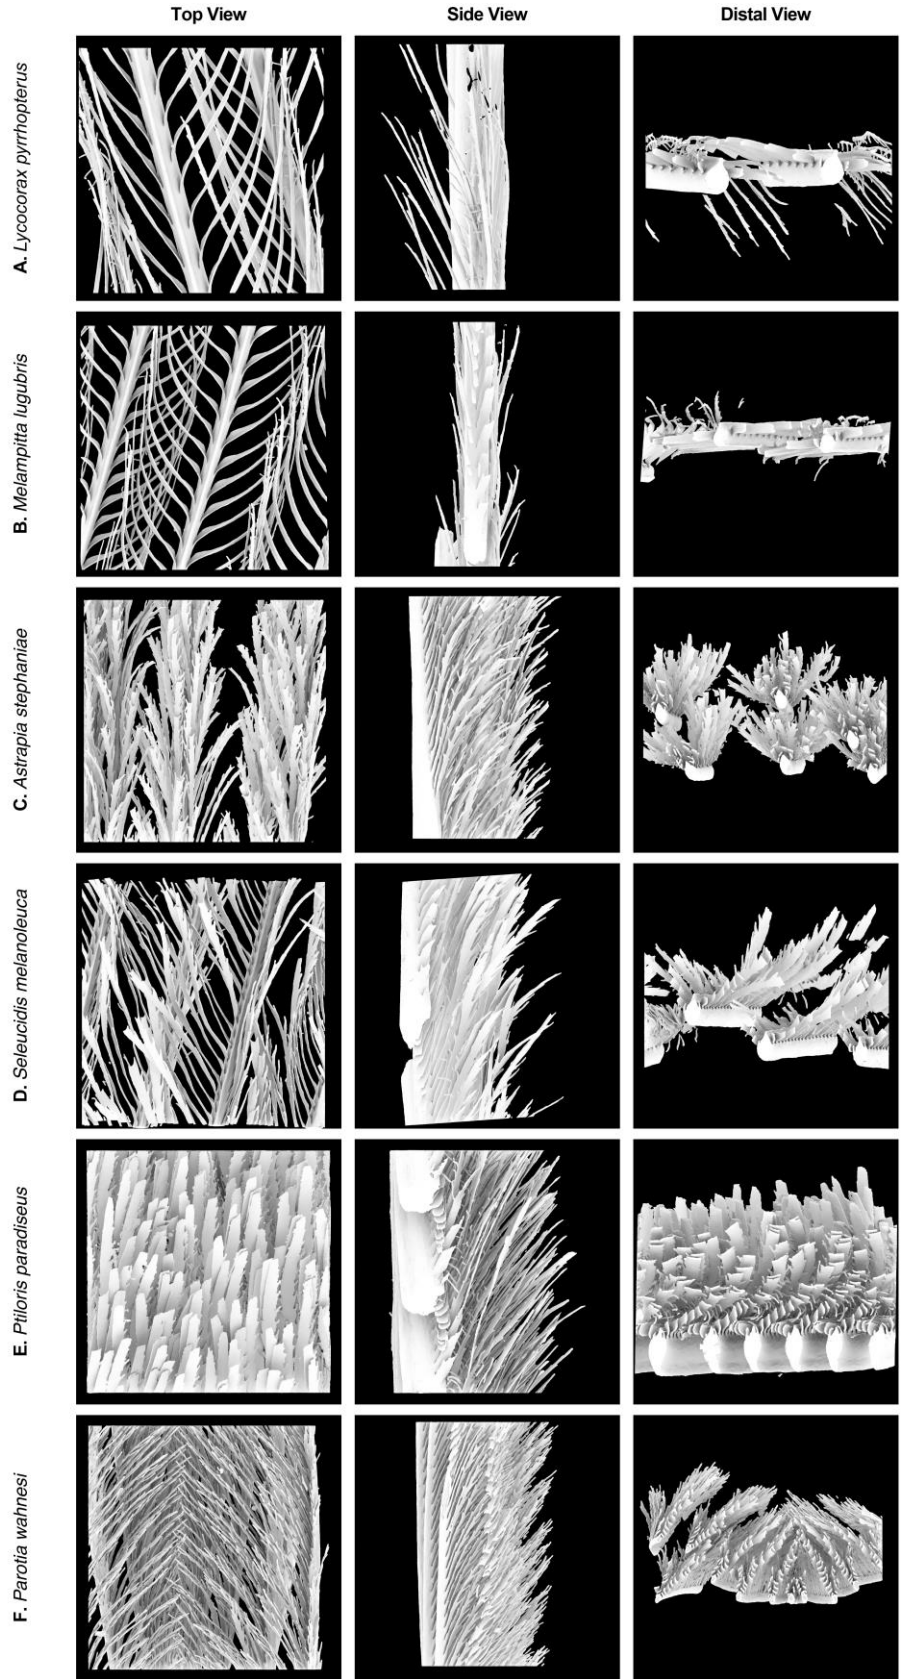

**Supplementary Figure 6. 3D rendering of the external surface of feathers extracted from CT scans.** View of the top or obverse feather surface (left), side view (middle), and distal view (right). Black feathers with normal barbules (A–B), and super black feathers with arrays of modified barbules (C–F). (A) *Lycocorax pyrrhopterus* back feather. (B) *Melampitta lugubris* breast feather. (C) *Astrapia stephaniae* breast feather. (D) *Seleucidis melanoleuca* breast feather. (E) *Ptiloris paradiseus* breast feather. (F) *Parotia wahnesi* crown feather. Each render is 500 $\mu$ m x 500 $\mu$ m



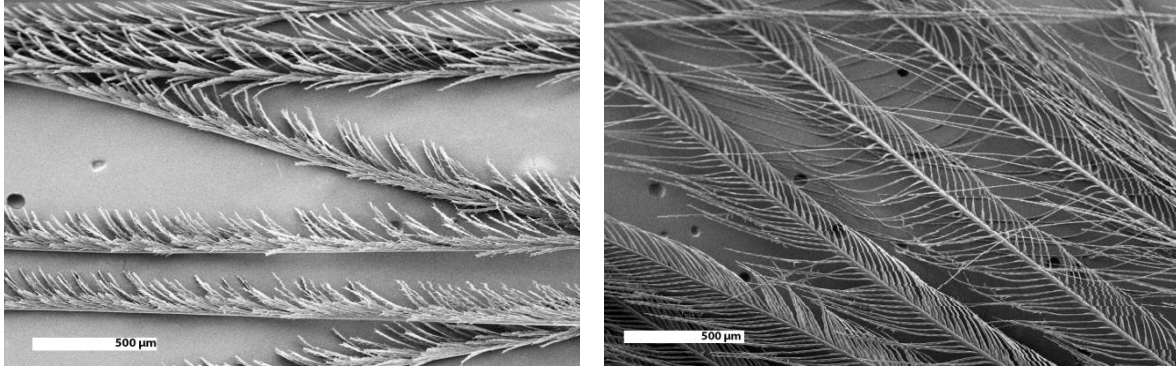

**Supplementary Figure 7. Variation barbule morphology within the vane of a super black breast feather from *Astrapia stephaniae*.** *Left*, Barbs and barbules from the *distal* tip of the feather with modified, structurally absorbing barbule arrays. *Right* Barbs and barbules from the proximal bases of the feather vane with normal barbule morphology. These barbules are deep within the plumage and are not modified for structural absorption. Scale bars are 500 µm.

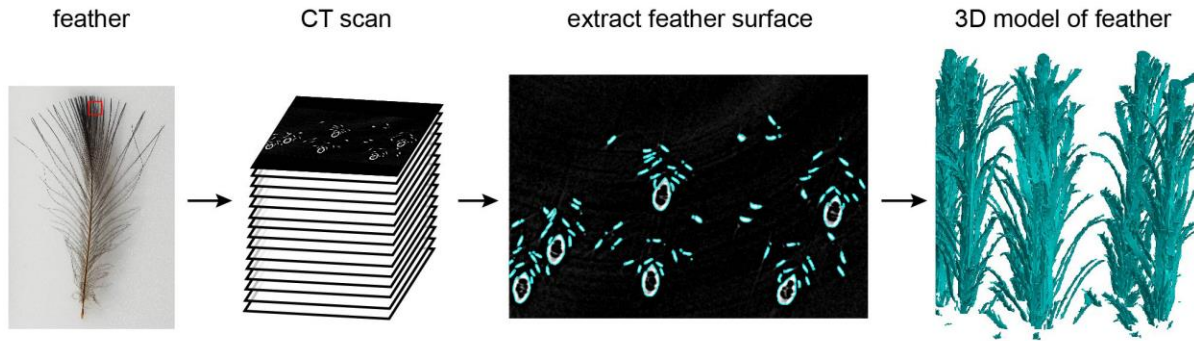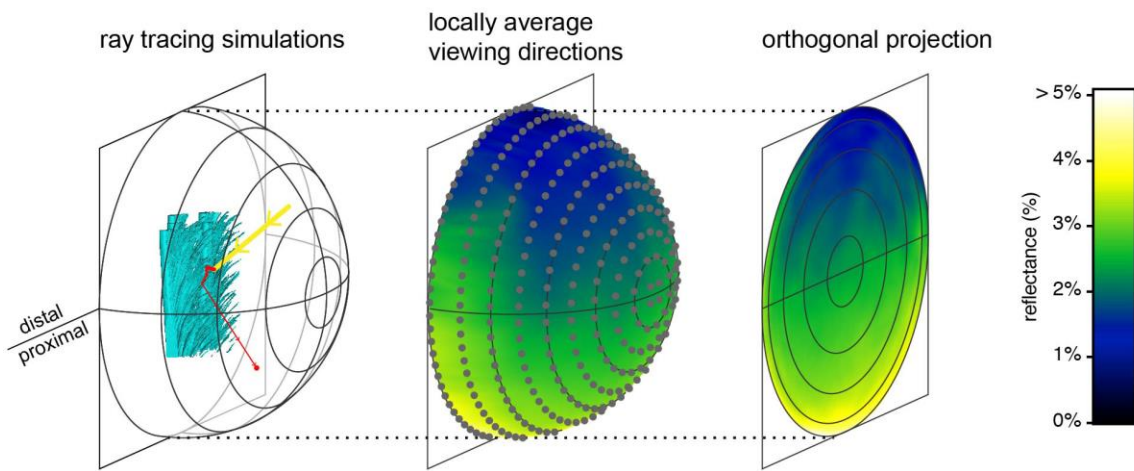

**Supplementary Figure 8. Schematic of the ray tracing simulation methods.** The distal tip of each feather was CT scanned at 650nm voxel resolution. The external surface of each feather was extracted from the CT image stack and converted into a 3D polygon mesh model. The 3D model was then imported into FRED for ray tracing simulations. The residual radiant power of rays that scattered off the surface of the feather and terminated on the reflectance hemisphere was tabulated. Locally averaged values for reflectance across the hemisphere were calculated for 400 evenly spaced viewing directions and plotted as a color gradient on orthogonal projections of the reflectance hemisphere.

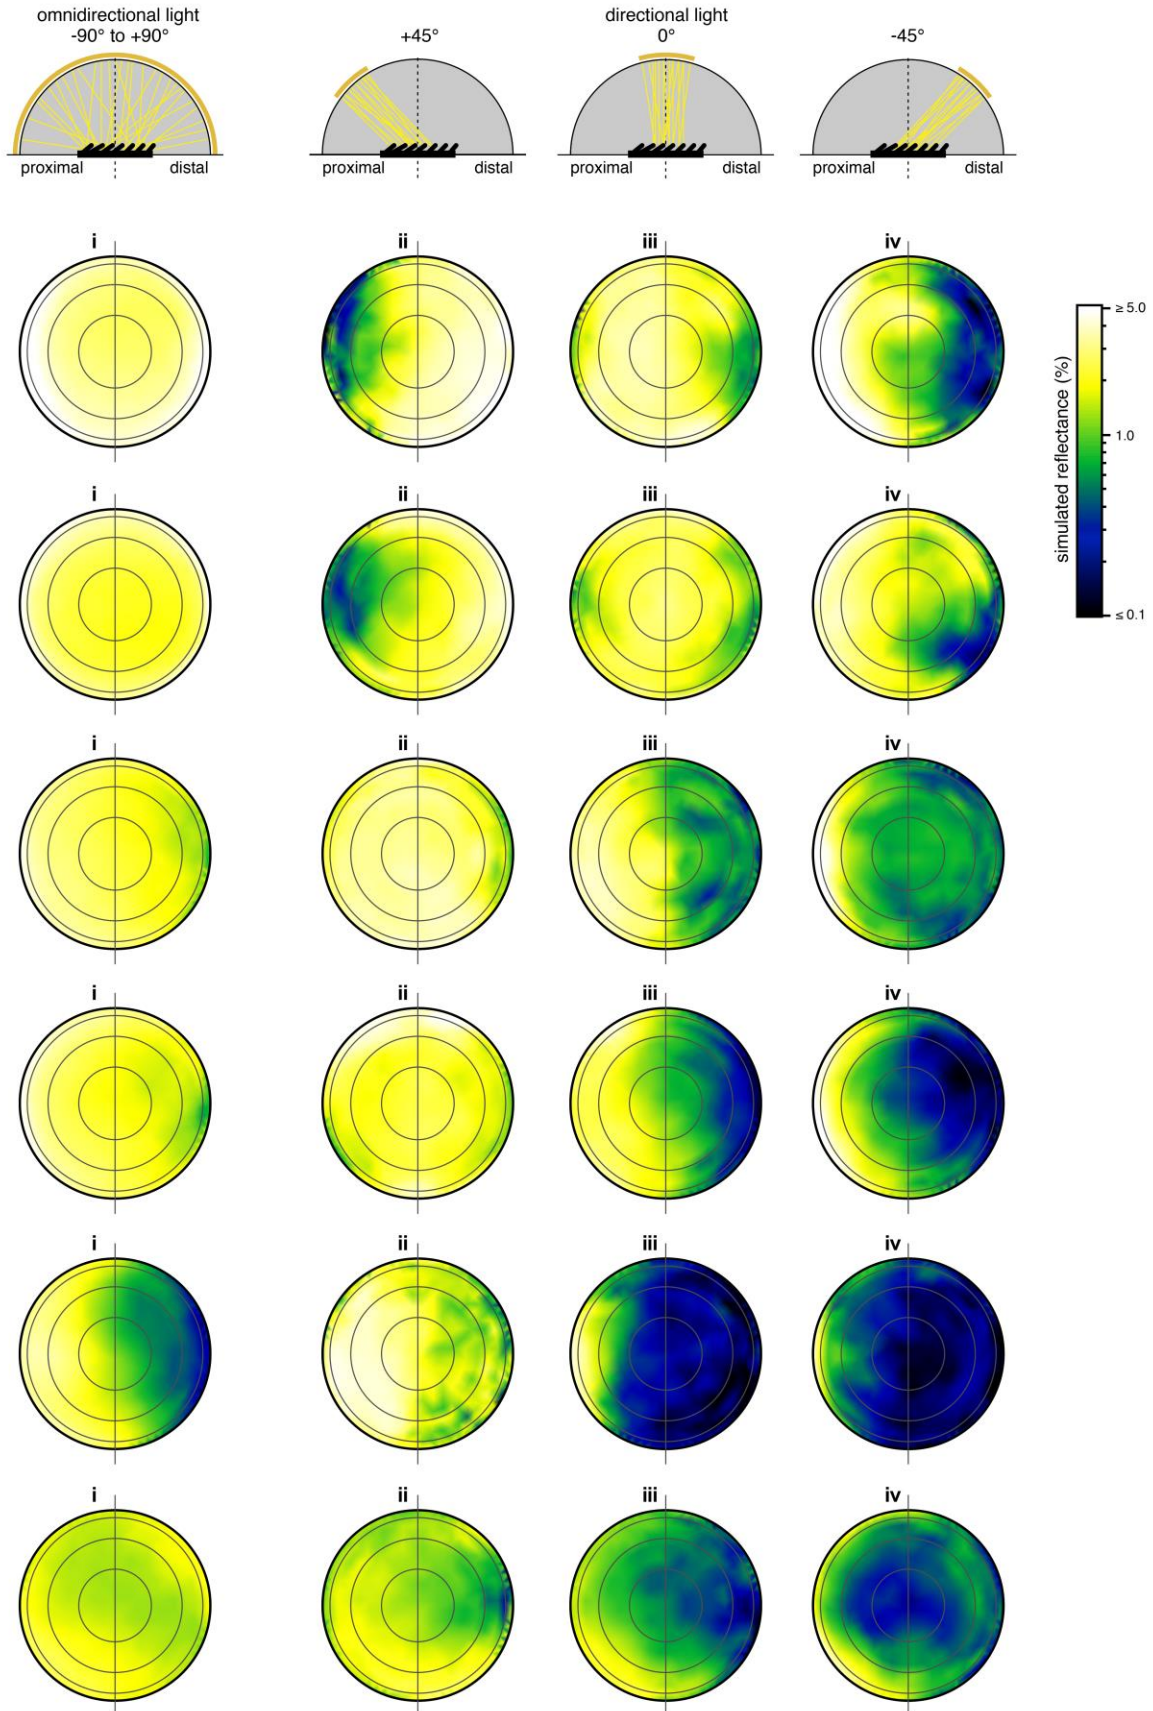

**Supplementary Figure 9. Directional reflectance of normal black and super black feathers under different lighting conditions, as predicted from ray tracing simulations.** Schematics of each lighting setup along top; **i.** omnidirectional lighting with randomized incident light angles distributed across the entire reflectance hemisphere from  $-90^\circ$  to  $+90^\circ$ , **ii.** beam of incident light tilted  $+45^\circ$  towards the proximal end of the feather, **iii.** beam of incident light oriented normal ( $0^\circ$ ) to the feather, and **iv.** beam of incident light tilted  $-45^\circ$  towards the distal end of the feather. Directional reflectance is plotted as a log scale color gradient on orthogonal projections of the reflectance hemisphere. Concentric rings represent  $22.5^\circ$ ,  $45^\circ$ ,  $67.5^\circ$  and  $90^\circ$ . (A) *Lycocorax pyrrhopterus* back feather. (B) *Melampitta lugubris* breast feather. (C) *Astrapia stephaniae* breast feather. (D) *Seleucidis melanoleuca* breast feather. (E) *Ptiloris paradiseus* breast feather. (F) *Parotia wahnesi* crown feather.

**Supplementary Table 1: Specimen details, spectrophotometry, and ray tracing results**

| Species                       | Plumage Patch | Barbule Type   | Spectrophotometry              |                                  | Ray Tracing Simulations         |                                          | Museum Catalog Number <sup>1</sup> |
|-------------------------------|---------------|----------------|--------------------------------|----------------------------------|---------------------------------|------------------------------------------|------------------------------------|
|                               |               |                | Total integrated Reflectance % | Normal Directional Reflectance % | Normal Directional Absorbance % | Normal Directional Multiple scattering % |                                    |
| <i>Lycocorax pyrrhopterus</i> | back          | normal         | 5.39                           | 4.68                             | 96.72                           | 33.66                                    | YPM 75285, 75289, <b>75291</b>     |
| <i>Melampitta lugubris</i>    | breast        | normal         | 4.47                           | 3.23                             | 97.02                           | 40.42                                    | YPM <b>75536</b> , 75537, 75538    |
| <i>Astrapia stephaniae</i>    | breast        | modified array | 3.14                           | 0.05                             | 97.81                           | 55.39                                    | YPM <b>7577</b>                    |
| <i>Seleucidis melanoleuca</i> | breast        | modified array | 3.18                           | 0.26                             | 98.98                           | 80.62                                    | YPM <b>75315</b> , 75317           |
| <i>Ptiloris paradiseus</i>    | breast        | modified array | 3.47                           | 0.29                             | 99.75                           | 95.05                                    | YPM <b>24130</b> , 94752           |
| <i>Parotia wahnesi</i>        | crown         | modified array | 3.43                           | 0.18                             | 99.46                           | 89.53                                    | AMNH 268233, <b>KU 93603</b>       |
| <i>Lophorina superba</i>      | cape          | modified array | 3.51                           | 0.31                             | NA                              | NA                                       | YPM 75359, 75360                   |
| <i>Lophorina superba</i>      | back          | normal         | 4.64                           | 3.56                             | NA                              | NA                                       | YPM 75359, 75360                   |

<sup>1</sup> YPM – Yale Peabody Museum, MCZ – Harvard Museum of Comparative Zoology, KU – University of Kansas Biodiversity Institute, AMNH – American Museum of Natural History; catalog numbers in bold were used in ray tracing simulations.

**Supplementary Table 2: Predicted directional reflectance (%) of distal and proximal quadrants from ray tracing simulations**

|                               | i. Omnidirectional |        | ii. Tilted +45° proximal |        | iii. 0° normal |        | iv. Tilted -45° distal |        |
|-------------------------------|--------------------|--------|--------------------------|--------|----------------|--------|------------------------|--------|
|                               | Proximal           | Distal | Proximal                 | Distal | Proximal       | Distal | Proximal               | Distal |
| <i>Lycocorax pyrrhopterus</i> | 4.33               | 3.73   | 2.33                     | 4.71   | 3.45           | 2.25   | 4.36                   | 1.03   |
| <i>Melampitta lugubris</i>    | 3.36               | 2.89   | 1.66                     | 3.41   | 2.51           | 1.92   | 3.28                   | 1.19   |
| <i>Astrapia stephaniae</i>    | 3.30               | 2.02   | 3.43                     | 3.18   | 3.17           | 0.76   | 3.58                   | 0.59   |
| <i>Seleucidis melanoleuca</i> | 3.40               | 1.95   | 3.18                     | 2.76   | 2.60           | 0.53   | 2.80                   | 0.28   |
| <i>Ptiloris paradiseus</i>    | 2.74               | 0.74   | 4.00                     | 1.60   | 2.08           | 0.19   | 0.90                   | 0.19   |
| <i>Parotia wahnesi</i>        | 1.91               | 1.64   | 1.62                     | 1.40   | 1.33           | 0.58   | 1.36                   | 0.56   |
